# Supplementary material for: Chemical mediated elasto-capillarity of elastic sheets
Source: Royal Society of Chemistry journal article supplement (doi:10.1039/c7sm01575e), 2017-01-01
Supplement: c7sm01575e1.pdf [file c7sm01575e1.pdf]

## Chemical mediated elasto-capillarity of elastic sheets

Jianlin Liu<sup>1,\*</sup>, Yulong Gong<sup>1</sup> & Gaofeng Cao<sup>1</sup>

---

<sup>1</sup>College of Pipeline and Civil Engineering, China University of Petroleum (East China), Qingdao 266580, China.

\*Correspondence and requests for materials should be addressed to Jianlin Liu (email: [liujianlin@upc.edu.cn](mailto:liujianlin@upc.edu.cn)).

## Supplementary materials

**Experimental setup for sheet adhesion.** As shown in Figure S1, two slender sheets made of polyester are fixed on a digital calliper by the double faced adhesive tape, and the calliper is horizontally fixed on an iron support. The two sheets have the same sizes and physical parameters, and they are initially parallel, i.e. vertical to the calliper before adhered by liquid. The distance between the two fixed ends can be modulated by moving the sliding vernier horizontally. Each sheet can be divided into two segments, i.e. the adhesion or wetted part and the detachment or dry part.

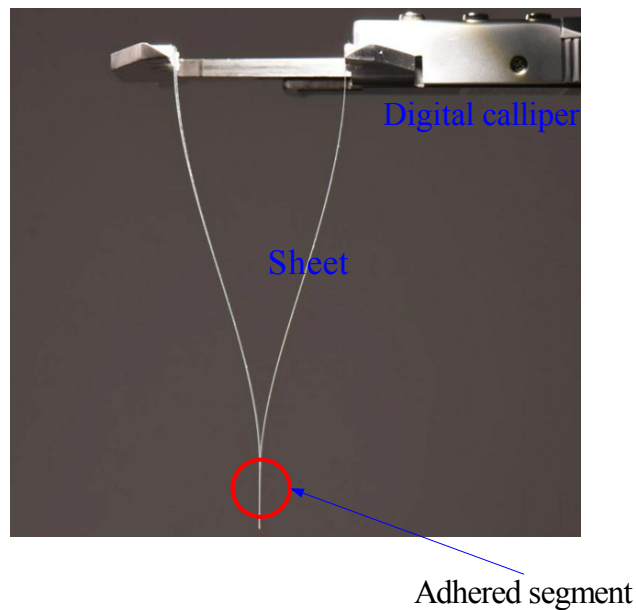

**Figure S1 Experimental setup for sheet adhesion.**

**Energy functional variation with movable boundary conditions.** Let us consider a generalized elastic system represented as a continuous and smooth curve, where part of the curve is adhered at interfaces. As schematized by the anti-clockwise arc length  $s$  in Fig. S2, the total length of the curve is

denoted by  $L$ . Assume that the elastic deformation only occurs on the segment from  $s=0$  to  $s=a$ . The total potential energy of the system encompasses two origins, namely, elastic strain energy and interfacial energy.

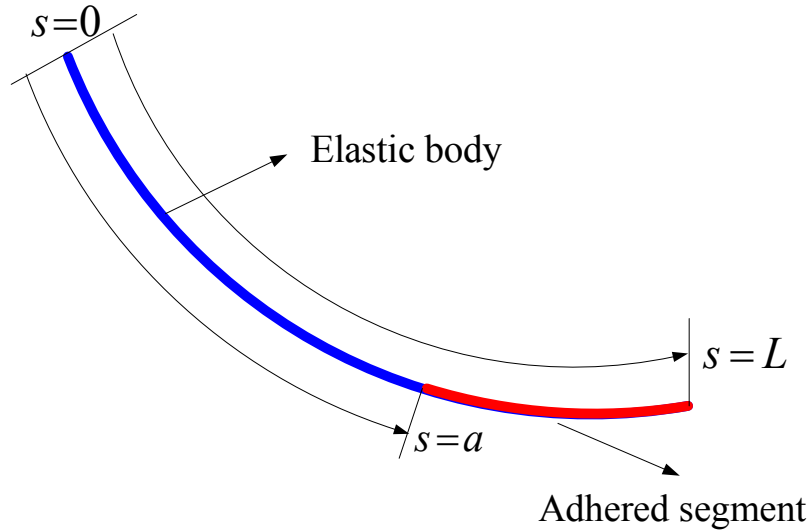

**Figure S2 Schematics for a system incorporating two parts with elastic energy and interfacial energy, respectively.**

The value of  $a$  is an unknown and should be determined in calculation, so the total potential energy of the system is viewed as a function of the parameter  $a$ :

$$\Pi[a] = U(a) + \Gamma(a), \quad (\text{S1})$$

where  $\Gamma(a)$  is the interfacial energy,  $U(a)$  is the strain energy stored in the system which is often expressed as  $U = \int_0^a F[s, y(s, a), y'(s, a), y''(s, a)] ds$ , and  $y$  is a function with two variables, i.e.  $y = y(s, a)$ .

The parameter  $W$  is designated as the surface energy density or the work of adhesion at the interface. The work of adhesion between two surfaces is normally expressed as

$$W = \gamma_1 + \gamma_2 - \gamma_{12}, \quad (\text{S2})$$

where  $\gamma_1$  and  $\gamma_2$  are the surface energy densities of the two different phases, and  $\gamma_{12}$  is the interfacial energy density. For the two phases being of the same material, the work of adhesion degenerates to the cohesive work

$$W = 2\gamma_1. \quad (\text{S3})$$

For a droplet on a substrate, the work of adhesion becomes

$$W = \gamma_{\text{SV}} + \gamma - \gamma_{\text{SL}} = \gamma(1 + \cos\theta_Y). \quad (\text{S4})$$

where  $\gamma_{\text{SV}}$ ,  $\gamma_{\text{SL}}$  and  $\gamma$  are the interfacial tensions of the solid/vapor, solid/liquid and liquid/vapor interfaces, respectively, with  $\theta_Y$  being the Young's contact angle of the liquid. In the above derivation, the Young's equation  $\gamma_{\text{SV}} - \gamma_{\text{SL}} = \gamma \cos\theta_Y$  is utilized.

The functional of the total potential energy about the system is normally written as:

$$\Pi[y(s, a)] = \int_0^a F[s, y(s, a), y'(s, a), y''(s, a)] ds - \int_a^L W ds. \quad (\text{S5})$$

In fact, the energy functional of Eq. (S5) is special in that it deals with two variables, i.e. the function  $y$  and the length  $a$ . This fact yields an intractable problem, because the undetermined variable  $a$  causes the boundary movement of the system, which should create an additional term during the variation process. By using the principle of least potential energy and considering the movable boundary, one obtains the following variational result

$$\delta \Pi[y(s, a)] = \delta \Pi_1 + \delta \Pi_2 = 0, \quad (\text{S6})$$

where

$$\delta \Pi_1 = \int_0^a (F_y \delta y + F_{y'} \delta y' + F_{y''} \delta y'') ds \quad (\text{S7})$$

$$= \left[ F_y \delta y + F_{y''} \delta y' - \frac{\partial}{\partial x} F_{y'} \delta y \right]_0^a + \int_0^a \left( F_y - \frac{\partial}{\partial x} F_{y'} + \frac{\partial^2}{\partial x^2} F_{y''} \right) \delta y ds,$$

and

$$\delta \Pi_2 = \left[ F - y' F_{y'} - y'' F_{y''} + y' \frac{dF_{y''}}{ds} + W \right]_{s=a} \delta a. \quad (\text{S8})$$

The fixed boundary conditions are prescribed as

$$y(0)=y_0, \quad y'(0)=y'_0; \quad y(a)=y_a, \quad y'(a)=y'_a. \quad (\text{S9})$$

According to the arbitrariness of the variation, one can get the governing differential equation, i.e. the Euler-Poisson equation:

$$F_y - \frac{\partial}{\partial s} F_{y'} + \frac{\partial^2}{\partial s^2} F_{y''} = 0, \quad (\text{S10})$$

and the arbitrariness of variation about the point  $a$  leads to the transversality condition

$$W = \left[ y' F_{y'} + y'' F_{y''} - y' \frac{dF_{y''}}{ds} - F \right]_{s=a}. \quad (\text{S11})$$

Actually, the transversality condition stands for the equilibrium state originating from the competition between surface energy and elastic energy at the critical point.
